# Supplementary material
Source: HighWire-hosted journal article supplement (https://mbio.asm.org/content/5/6/e02136-14)

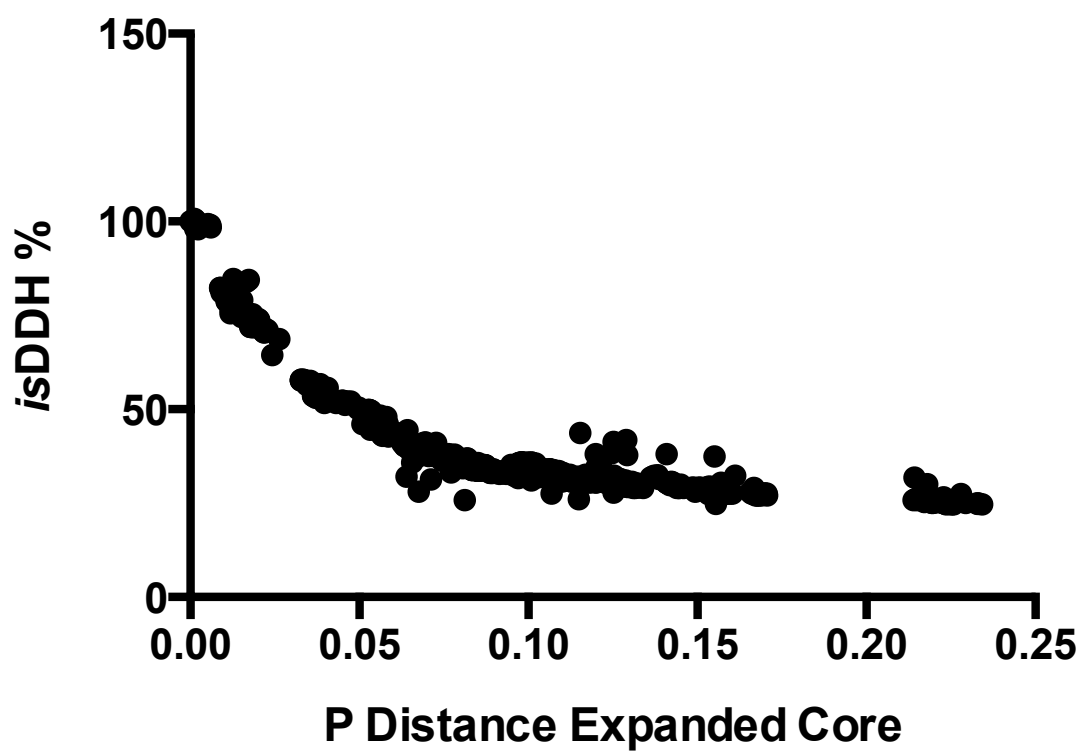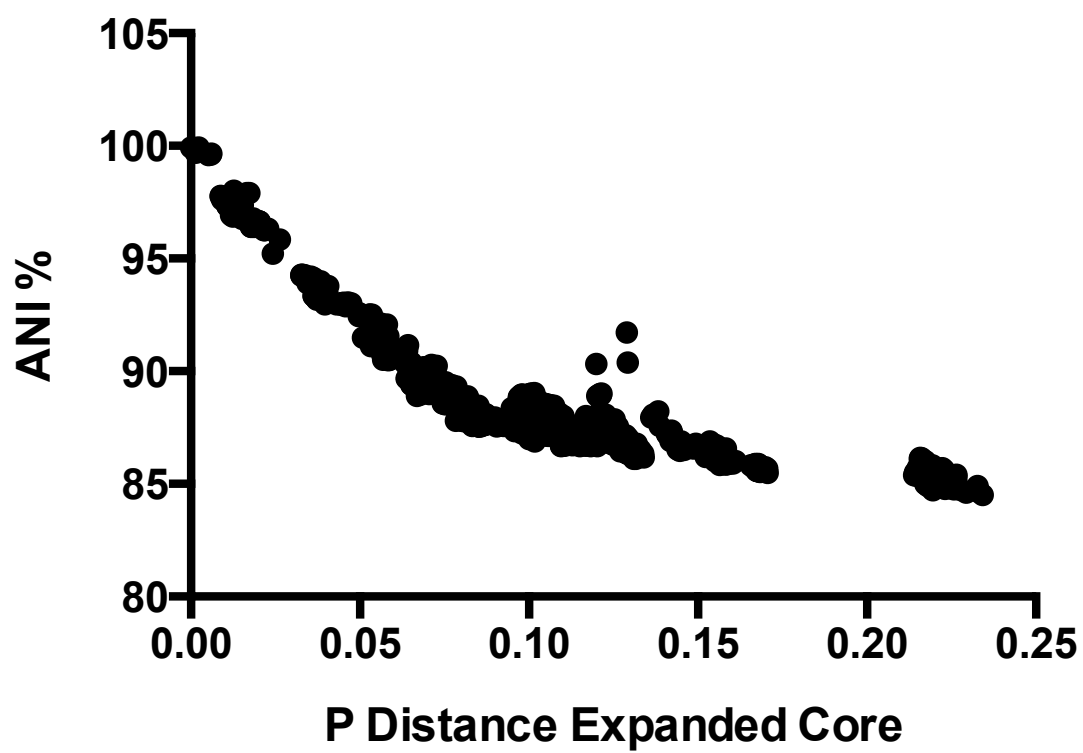

Supplement: inline-supplementary-material-6 [file inline-supplementary-material-6.pdf]
